# Supplementary material for: Rbms3 functions in craniofacial development by posttranscriptionally modulating TGF-β signaling
Source: PubMed Central journal article supplement — J Cell Biol. 2012 Oct 29;199(3):453–66. doi: 10.1083/jcb.201204138 (PMC3483135; doi:10.1083/jcb.201204138), 2012-10-29
Supplement: supp_jcb.201204138_JCB_201204138_sm.pdf [file supp_jcb.201204138_JCB_201204138_sm.pdf]

Jayasena and Bronner, <http://www.jcb.org/cgi/content/full/jcb.201204138/DC1>

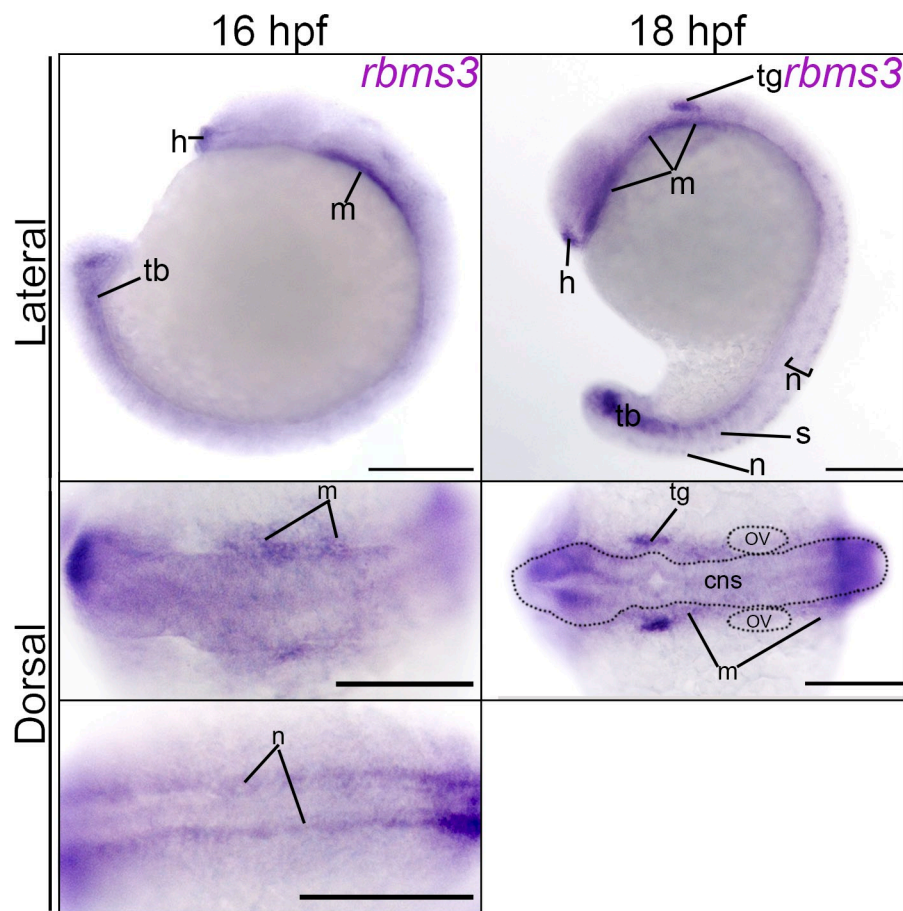

Figure S1. Expression for *rbms3* at 16 and 18 hpf expands to the nervous system and cranial mesenchyme. Lines and brackets highlight expression. cns, central nervous system; h, hatching gland; m, cranial mesenchyme; n, neurons; ov, otic vesicle; s, somites; tb, tail bud; tg, trigeminal ganglion. Bars, 200  $\mu$ M.
